# Supplementary material for: Tensor-valued diffusion MRI differentiates cortex and white matter in malformations of cortical development associated with epilepsy
Source: PubMed Central journal article supplement (PMC7963222; doi:10.1111/epi.16605), 2020-07-15
Supplement: NIHMS1674099-supplement-Supplemental_Material.pdf [file NIHMS1674099-supplement-Supplemental_Material.pdf]

## Supporting Tables

**Table S1 Patient characteristics**

| <b>Patient</b> | <b>Sex</b> | <b>Age</b> |
|----------------|------------|------------|
| 1              | M          | 48         |
| 2              | F          | 32         |
| 3              | F          | 20         |
| 4              | F          | 52         |
| 5              | F          | 18         |
| 6              | F          | 38         |
| 7              | F          | 26         |
| 8              | M          | 26         |
| 9              | F          | 24         |
| 10             | M          | 26         |
| 11             | F          | 52         |
| 12             | M          | 37         |
| 13             | M          | 15         |

**Table S2 Detailed parameters for the diffusion sequence***Scanner: Philips 7 Tesla Achieva*

|                                    |                               |
|------------------------------------|-------------------------------|
| Field strength [T]                 | 7                             |
| Maximal gradient amplitude [mT/m]  | 64                            |
| Maximal gradient slew rate [T/m/s] | 100                           |
| Head-coil                          | 2Tx/32Rx-channel <sup>a</sup> |

*Imaging parameters*

|                                 |          |
|---------------------------------|----------|
| Repetition time [ms]            | 3500     |
| Echo time [ms]                  | 89       |
| Acquisition time [min:sec]      | 6:04     |
| Parallel imaging factor (SENSE) | 2        |
| Partial Fourier                 | 0.75     |
| Bandwidth [Hz/pixel]            | 1933     |
| Fat saturation                  | 'strong' |

*Geometry*

|                                     |         |
|-------------------------------------|---------|
| Matrix size                         | 112×112 |
| Number of slices                    | 15      |
| Voxel dimensions [mm <sup>3</sup> ] | 2×2×4   |

*Diffusion parameters*

|                                                          |                                    |
|----------------------------------------------------------|------------------------------------|
| $b_{\Delta}$ -values                                     | 1 and 0 <sup>b</sup>               |
| $b$ -values [ms/ $\mu\text{m}^2$ ]                       | 0,0.1,0.5,1.0,1.5,2.0 <sup>c</sup> |
| Number of directions / $b$ -value                        | 1,6,6,10,11,16 <sup>d</sup>        |
| Number of samples                                        | 92                                 |
| Maxwell compensation                                     | No <sup>e</sup>                    |
| $\delta_1, \delta_2, \delta_P$ ( $b_{\Delta} = 1$ ) [ms] | 21.0, 21.0, 17.5                   |
| $\delta_1, \delta_2, \delta_P$ ( $b_{\Delta} = 0$ ) [ms] | 33.5, 25.5, 10.1                   |

<sup>a</sup>In Patient 8, a 1Tx/32Rx-channel setup was used, without dielectric pads.

<sup>b</sup>The  $b_{\Delta} = 0$  gradient waveform was optimized for minimal TE as in Sjölund et al<sup>1</sup>.

<sup>c</sup>All  $b$ -values were acquired for both  $b_{\Delta}$ -values.

<sup>d</sup>From Jones et al<sup>2</sup> and Leemans et al<sup>3</sup>.

<sup>e</sup>See Szczepankiewicz et al<sup>4</sup>.

$\delta_1$  and  $\delta_2$  and are the gradient waveform durations before and after the refocusing pulse with duration  $\delta_P$ , respectively.

## REFERENCES

1. Sjölund J, Szczepankiewicz F, Nilsson M, Topgaard D, Westin C-F, Knutsson H. Constrained optimization of gradient waveforms for generalized diffusion encoding. *J Magn Reson*. 2015;261:157-68.
2. Jones DK, Horsfield MA, Simmons A. Optimal strategies for measuring diffusion in anisotropic systems by magnetic resonance imaging. *Mag Reson Med*. 1999;42(3):515-25.
3. Leemans A, Jeurissen B, Sijbers J, Jones D. ExploreDTI: a graphical toolbox for processing, analyzing, and visualizing diffusion MR data. *Proc Intl Soc Mag Reson Med*. 2009.
4. Szczepankiewicz F, Westin CF, Nilsson M. Maxwell-compensated design of asymmetric gradient waveforms for tensor-valued diffusion encoding. *Magn Reson Med*. 2019;82(4):1424-37.
